# Supplementary material for: Hybrid Carbon Supports Composed of Small Reduced Graphene Oxide and Carbon Nanotubes for Durable Oxygen Reduction Catalysts in Proton Exchange Membrane Fuel Cells
Source: MDPI journal article supplement (doi:10.3390/ijms232113312), 2022-11-01
Supplement: s1 [file s1]

## Supplementary Information

### Hybrid Carbon Supports Composed of Small Reduced Graphene Oxide and Carbon Nanotubes for Durable Oxygen Reduction Catalysts in Proton Exchange Membrane Fuel Cells

*Su-Jeong Bak<sup>a,1</sup>, Mingyu Son<sup>a,b,1</sup>, Jeehoon Shin<sup>a</sup>, Sun-I Kim<sup>a</sup>, Jung Woo Lee<sup>b,\*</sup>, Duck Hyun Lee<sup>a,\*</sup>*

*<sup>a</sup>Green Materials and Processes R&D Group, Korea Institute of Industrial Technology, Ulsan 44413, Republic of Korea*

*<sup>b</sup>Department of Materials Science & Engineering, Pusan National University, Busan 46241, Republic of Korea*

\* Address correspondence to: [dulee@kitech.re.kr](mailto:dulee@kitech.re.kr) (D. H. Lee), [jungwoolee@pusan.ac.kr](mailto:jungwoolee@pusan.ac.kr) (J. W. Lee)

<sup>1</sup> These authors contributed equally to this work

## SUPPLEMENTARY FIGURES

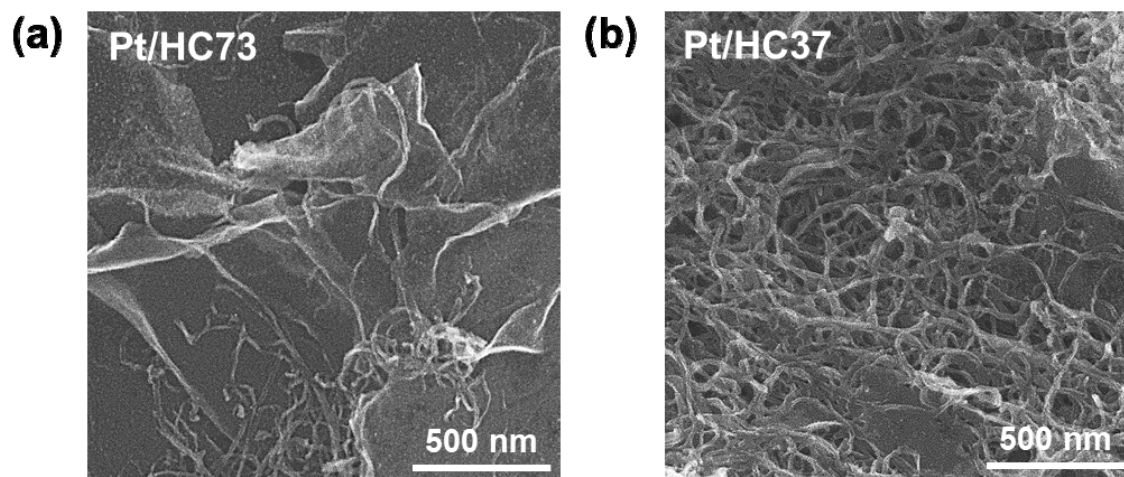

**Figure S1.** Scanning electron microscopy (SEM) images of the synthesized (a) Pt/HC73 and (b) Pt/HC37.

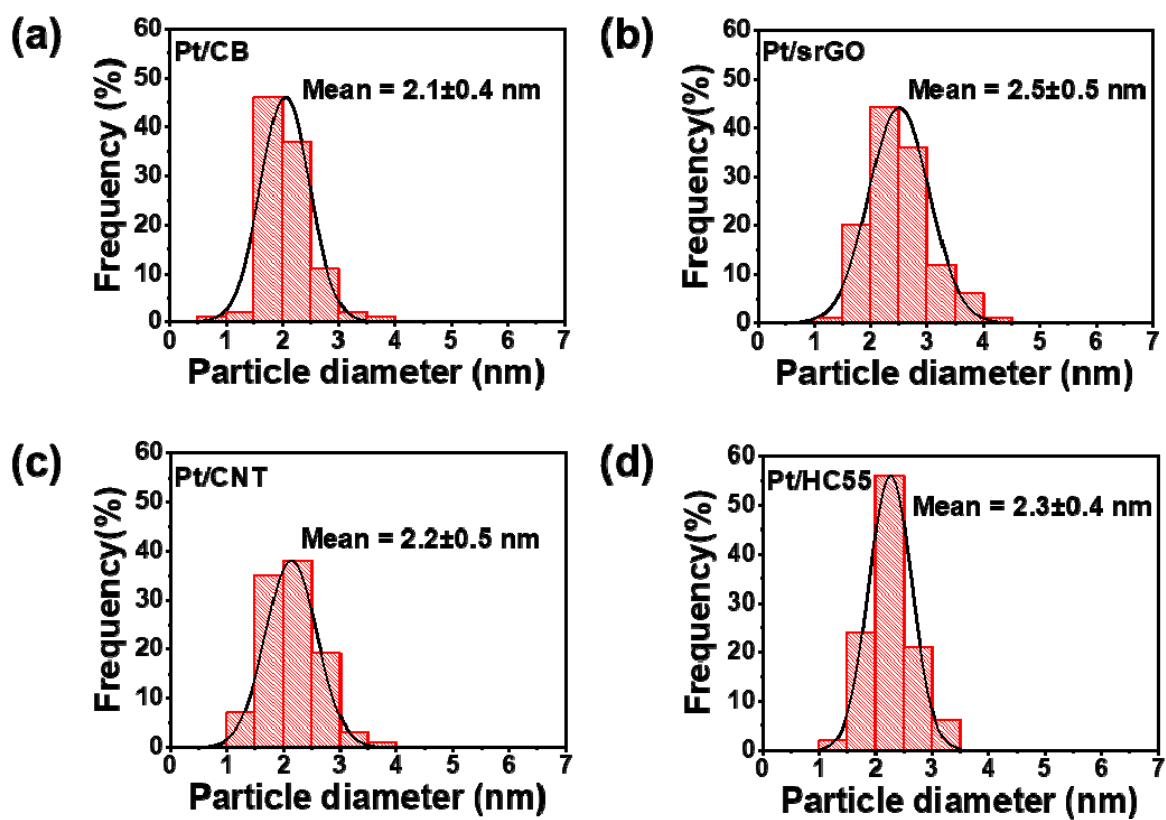

**Figure S2.** Pt particle size distribution histograms of (a) Pt/CB, (b) Pt/srGO, (c) Pt/CNT and (d) Pt/HC55.

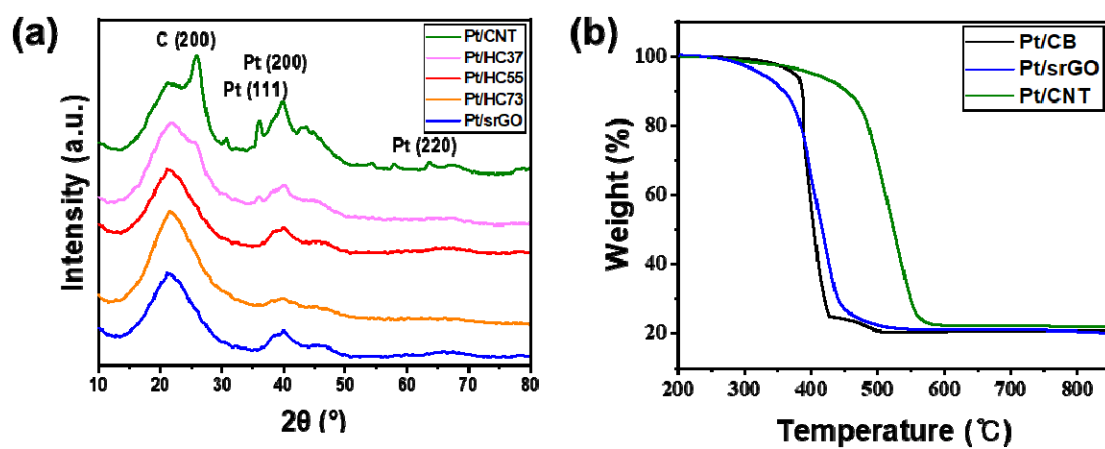

**Figure S3.** (a) X-ray diffraction patterns and (b) Thermogravimetric analysis (TGA) curves of the synthesized catalysts.

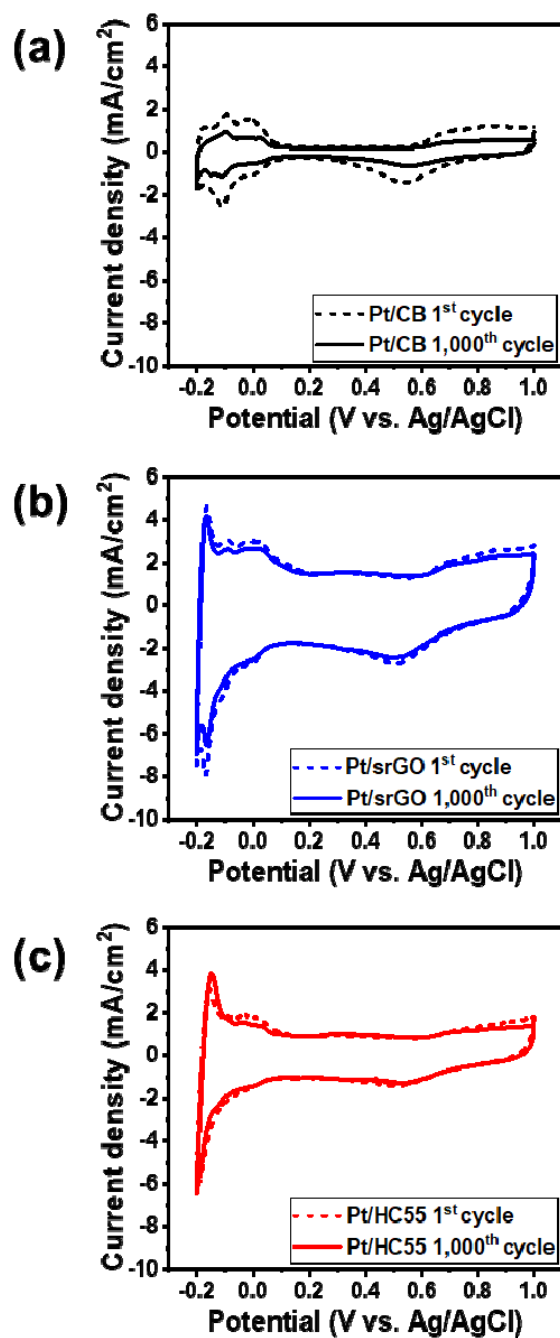

**Figure S4.** Cyclic voltammetry curves of (a) Pt/CB, (b) Pt/srGO, and (c) Pt/HC55 before and after the 1,000 cycles of accelerated durability tests in N<sub>2</sub>-saturated 0.5 M H<sub>2</sub>SO<sub>4</sub> at a scan rate of 50 mV/s.
